# Supplementary material for: Novel organocycloborates via Grignard reagentsElectronic supplementary information (ESI) available: experimental details and 1H, 13C and 11B NMR data for 1, 2, 3and 4, single crystal X-ray data and additional figures for 3and 4. See http://www.rsc.org/suppdata/cc/b4/b404864d/
Source: Royal Society of Chemistry journal article supplement (doi:10.1039/b404864d), 2004-01-01
Supplement: b404864d.doc [file b404864d.doc]

Novel organocycloborates *via* Grignard reagents

H. Braunschweig, G. D’Andola, T. Welton, and A. J. P. White.

**Experimental details**

All manipulations of air-sensitive materials were performed under an inert atmosphere of dry nitrogen using standard Schlenk techniques. Solvents were purified and dried according to standard methods[[1]](#endnote-2) and stored over molecular sieve under an inert atmosphere of nitrogen. All the starting materials are commercially available and were used as received without further purification.

1H, 11B and 13C NMR spectra were recorded either on a JEOL-EX 270 spectrometer (1H: 269.72 MHz; 11B: 86.54 MHz; 13C: 67.93 MHz), Chemical shifts for 1H and 13C NMR spectra are referenced to internal solvent resonances and are reported relative to tetramethylsilane (1H, 13C). Chemical shifts for 11B NMR spectra are referenced to trifluoroborane diethyletherate as an external standard.

***Synthesis of Bis(B-B-dicyclohexylboratacyclopentane)magnesium (3)***

A 250 ml three neck round bottom flask was equipped with a pressure equalising dropping funnel, a magnetic stirring bar and reflux condenser leading to an oil bubbler. The apparatus was dried and filled with nitrogen. A solution of cyclohexene (6 ml, 59.2 mmol) in THF (20 ml) was placed in the dropping funnel and added dropwise to a stirred 1.0M solution of BH3THF (30 ml, 30.0 mmol) at -15 C. The system was stirred for 1 hour, during which time white crystalline dicyclohexylborane precipitated.[[2]](#endnote-3) Subsequently, a solution of 4-Br-1-butene (3.0 ml, 29.6 mmol) in THF (20 ml) was added dropwise to a stirred suspension of dicyclohexylborane at 0 °C. The resulting cloudy solution was allowed to reach room temperature and stirred overnight. The cloudy solution was centrifuged to separate the off-white suspensions and the colourless solution dried *in vacuo* to yield (4-bromo-butyl)dicyclohexylborane **1** as a colourless oil. (Yield = 91%)

NMR data for **1**. 1H NMR (THF-d8):  = 1.11-1.74 (br, m,), 1.84 (m, 2H, Cy2BCH2CH2C*H2*CH2Br), 3.44 (t, 3J = 6.81 Hz, 2H, Cy2BCH2CH2CH2C*H*2Br). 13C NMR (THF-d8):  = 23.29, 27.80, 28.29, 33.87, 36.60 (br), 37.09. 11B NMR (THF-d8):  = 82.4.

A solution of Cy2B(CH2)4Br (8.45 g, 27.0 mmol) in Et2O (20 ml) was added dropwise to a suspension of activated Mg turnings (3 g) in Et2O (15 ml) at room temperature. When the reaction was complete, the system was allowed to reach room temperature and a white precipitate started to form. The mixture was stirred overnight, diluted with THF (50 ml), and filtered hot to give a clear solution. 1,4-dioxane (2.3 ml, 26.99 mmol) in Et2O (10 ml) was added dropwise and the resulting solution was stirred overnight. The white precipitate of MgBr2dioxane was separated from the solution by centrifugation, and the clear solution was concentrated to a small volume *in vacuo* to give colourless crystals at 0 ºC. (Yield = 86%)

NMR data for **3**. 1H NMR (THF-d8):  = -0.17 (br), 0.72-1.57 (br, m). 13C NMR (THF-d8):  = 30.10, 31.68 (br), 32.66, 32.74. 11B NMR (THF-d8):  = - 12.5 ppm. Electro Spray MS: m/z (ESI-) 233 ([C16H30B] -, 100%).

***Synthesis of [(1,5 pentadiyl-9-borabicyclo[3.3.1]nonan-ate])magnesiumbromide (4)***

A solution of 9-BBN (dimer) (2.68 g, 11.00 mmol) in THF (50 ml) was added dropwise to a colourless solution of 5-Br-1-pentene (2.6 ml, 21.95 mmol) in THF (20 ml) at 0°C. When the addition was complete, the solution was allowed to reach room temperature and stirred overnight. The colourless solution of 9-boro(3-Bromo-pentyl)bicyclo[3.3.1]nonane was dried *in vacuo* and analysed by NMR spectroscopy.

NMR data for **2**. 1H NMR (THF-d8)*:*  = 1.20-1.94 (br, m, 22H), 3.42 (t, 3J = 6.80 Hz, 2H, R2BCH2(CH2)3*CH2*Br). 13C NMR (THF-d8):  = 24.18, 24.63, 27.36 (br), 30.93 (br), 32.35, 33.73 (s), 33.94, 34.05, 34.18. 11B NMR (THF-d8):  = 75.8 ppm.

The previously prepared borane was dissolved in THF (20 ml) and added dropwise to a suspension of activated Mg turnings in Et2O (15 ml) at room temperature. When the addition was complete, the system was refluxed at 60°C overnight. The resulting grey solution was diluted with THF (50 ml) and filtered hot to give a clear solution, which was concentrated to a small volume *in vacuo* to give colourless crystals at 0 ºC. (Yield = 89%)

NMR data for **4**. 1H NMR (THF-d8)*:*  = -0.33 (br), 0.80-1.44 (br, m). 13C NMR (THF-d8):  = 28.23, 28.88 (br), 30.38, 34.07, 34.51. 11B NMR (THF-d8):  = - 20.5 ppm. Electro Spray MS: m/z (ESI-) 191 ([C13H24B] -, 100%).

**Supplementary Data**


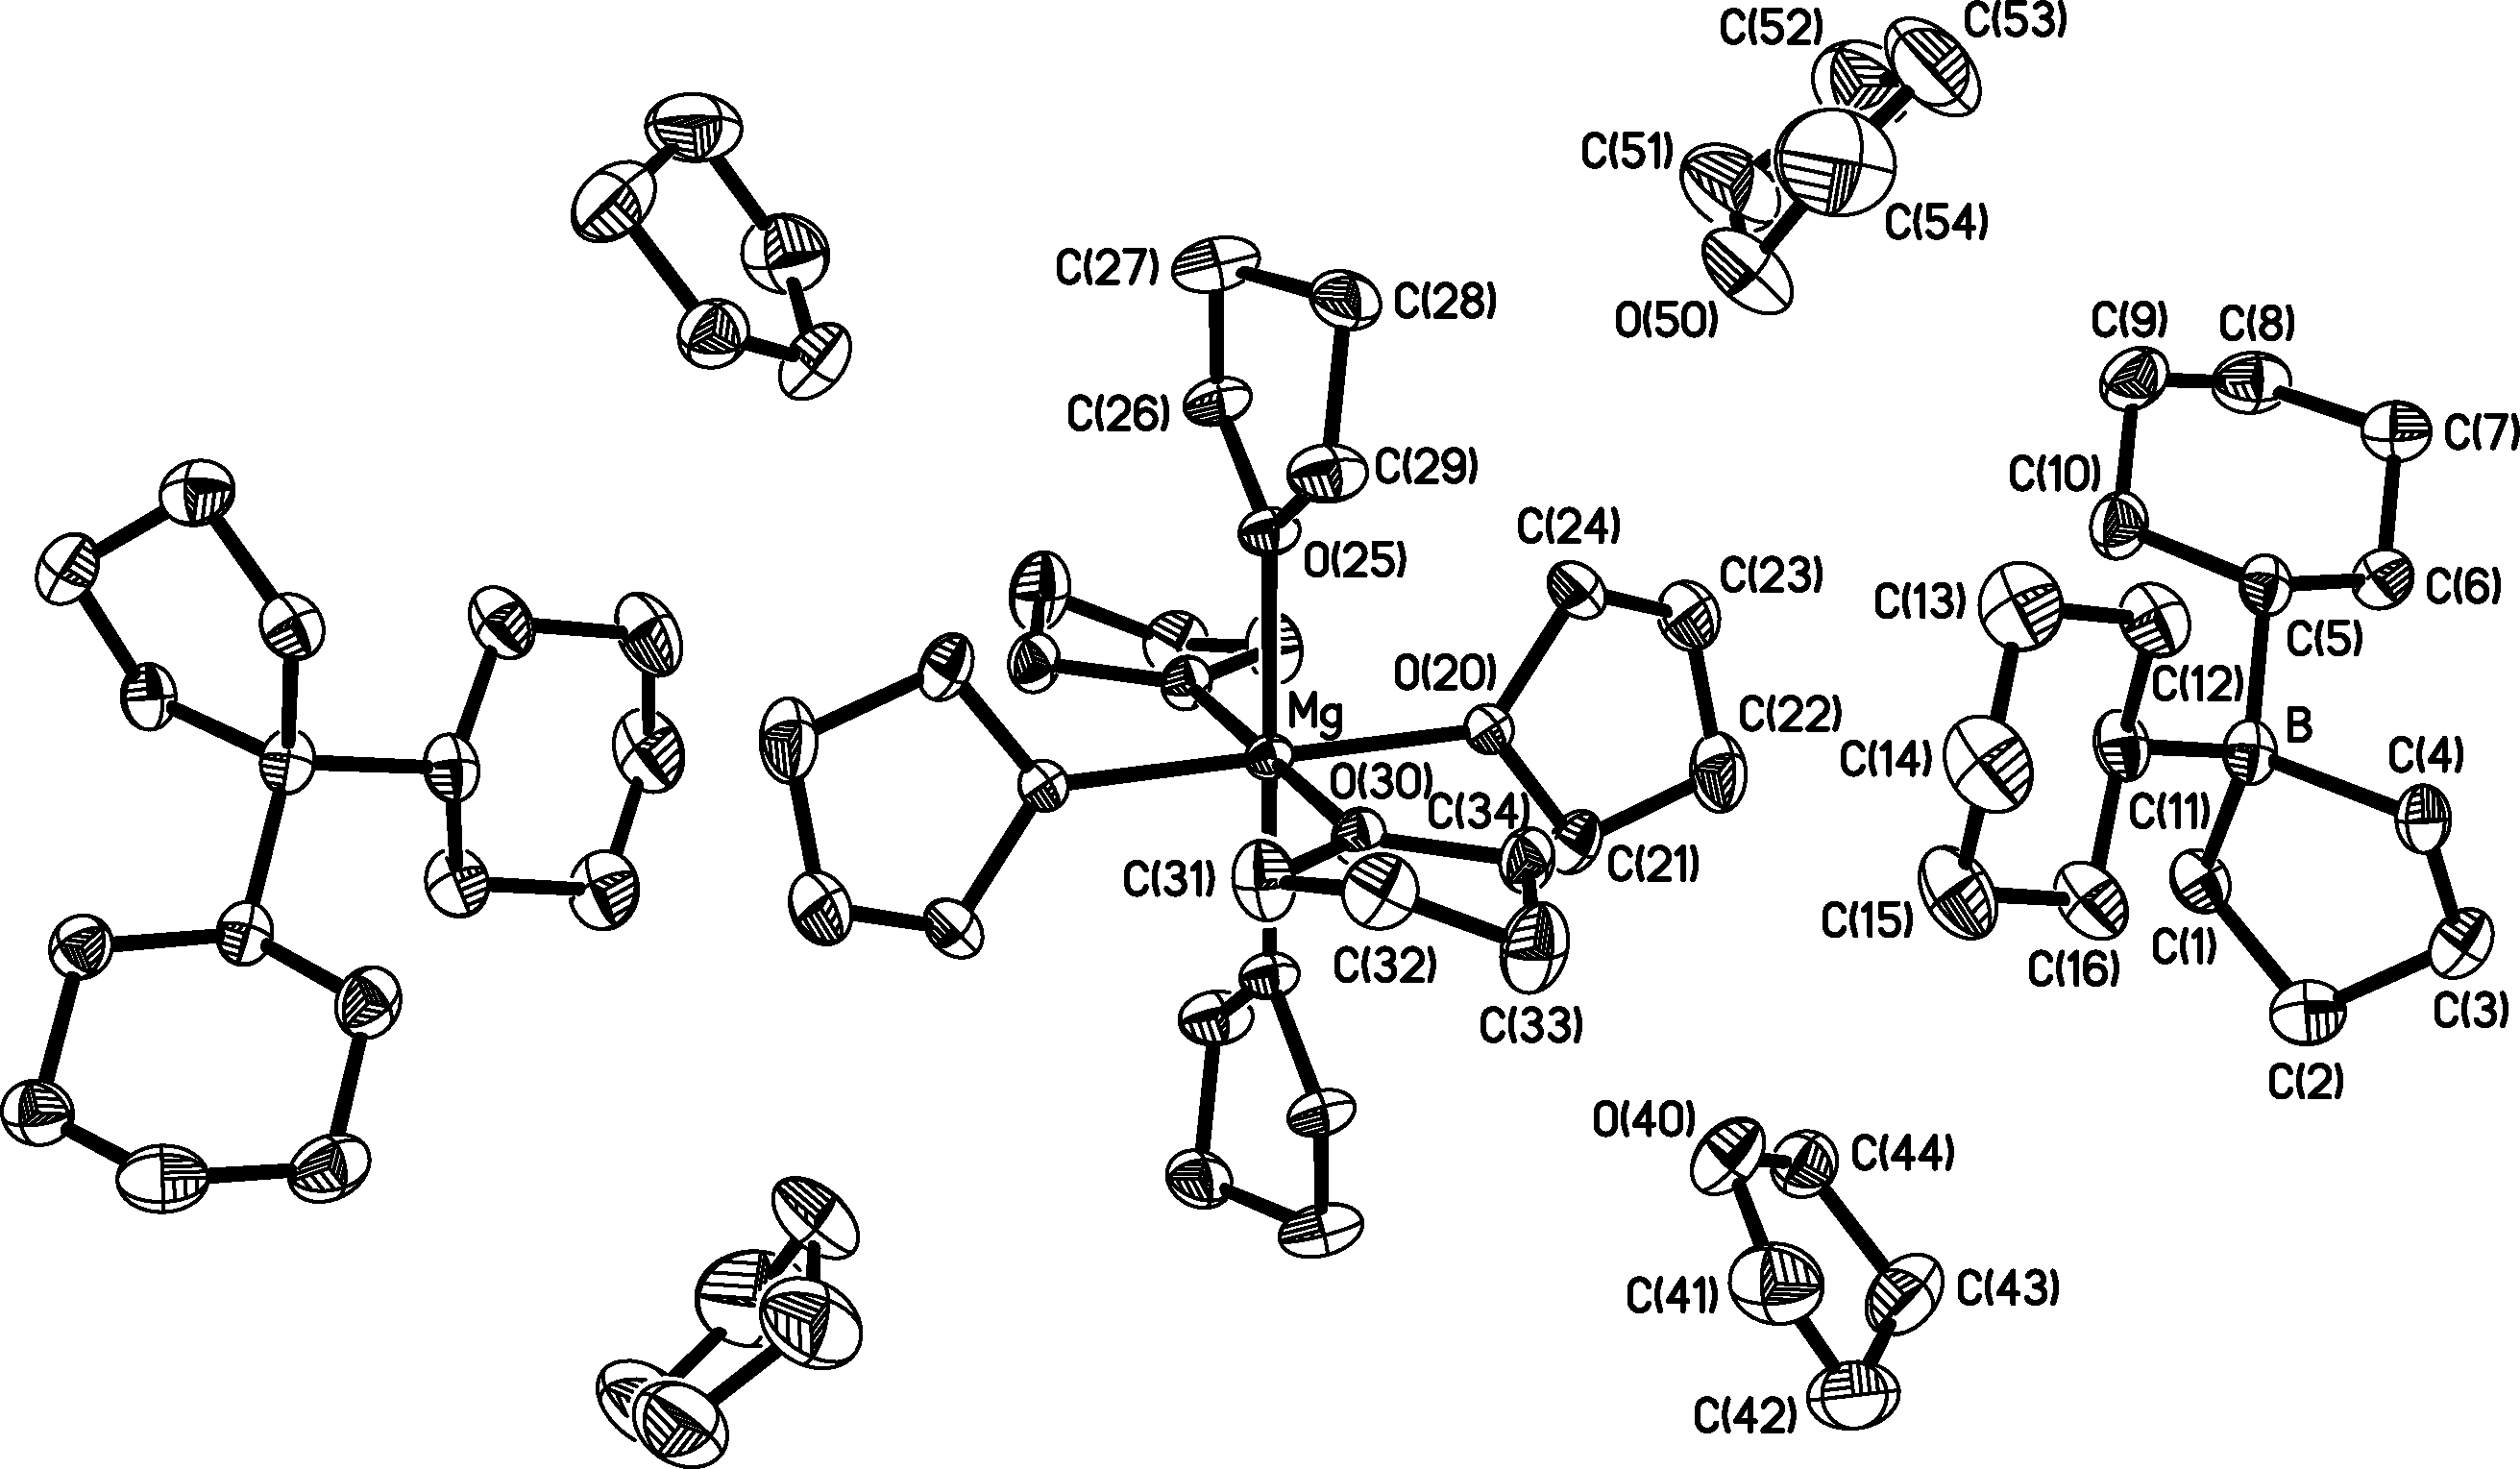


Fig. S1. The molecular structure of **3** (30% probability ellipsoids). The magnesium is situated at a centre of symmetry.


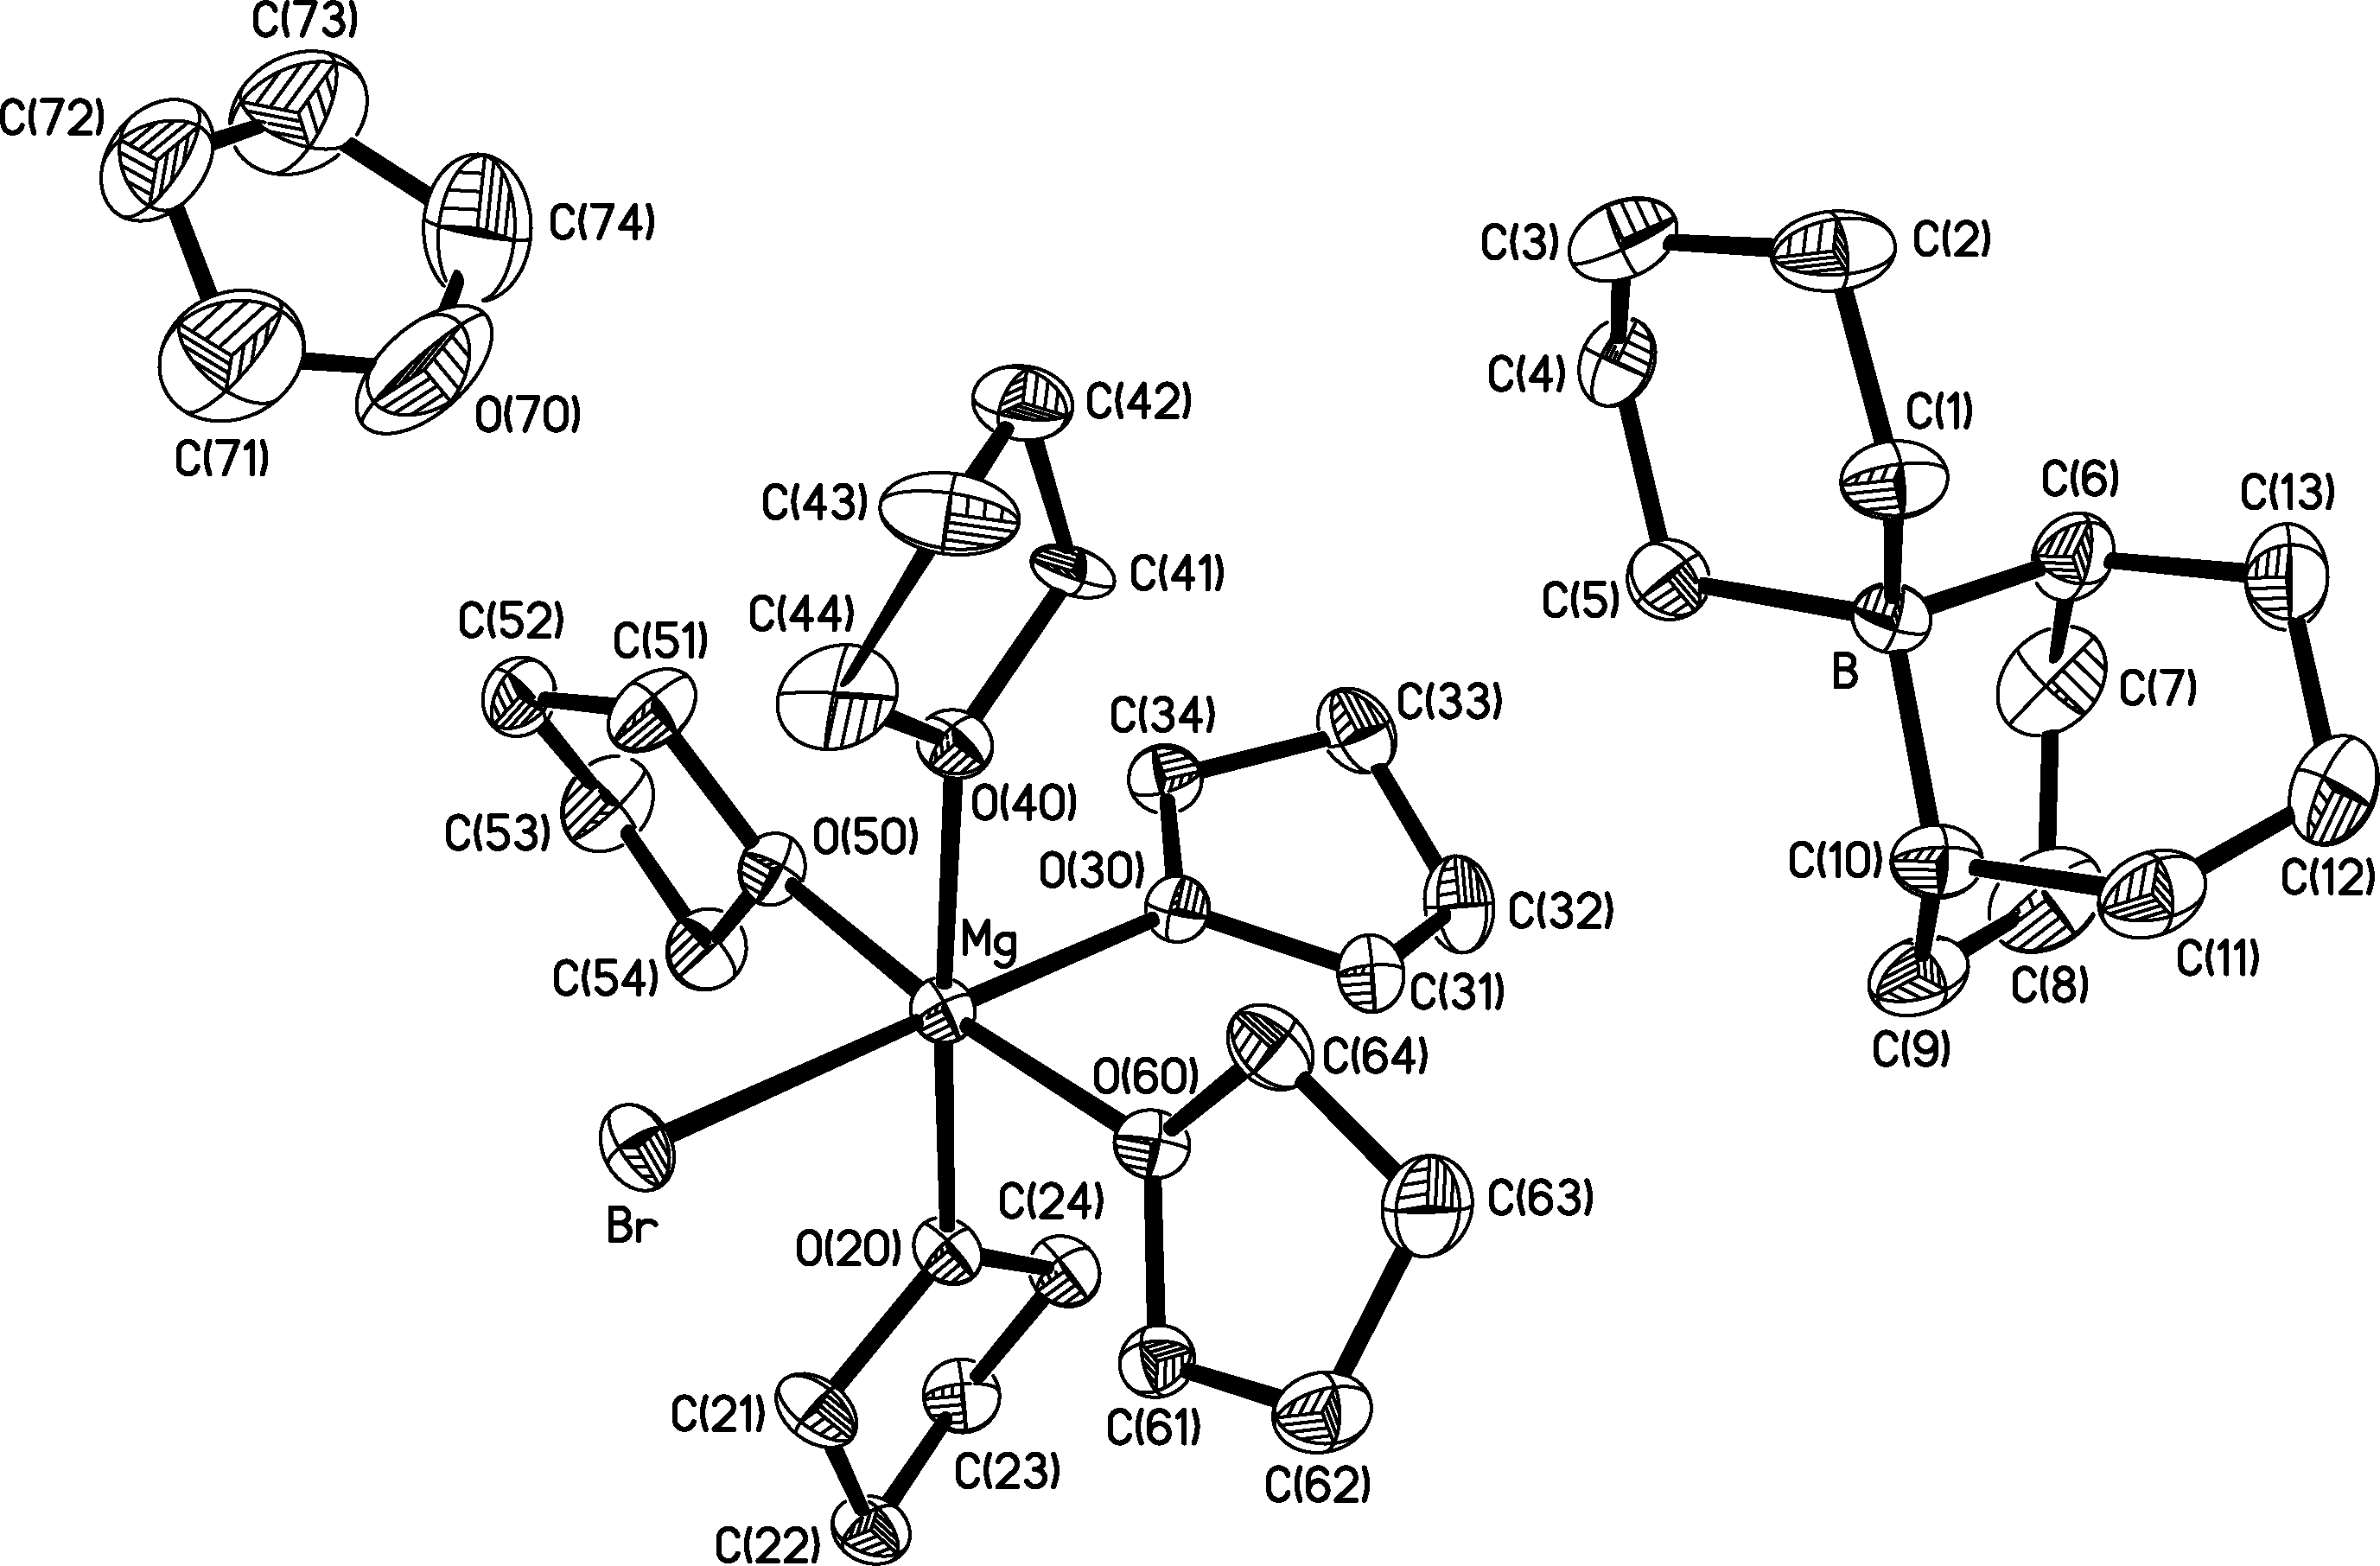


Fig. S2. The molecular structure of **4** (30% probability ellipsoids).

1. D.D. Perrin, W.L.F. Amarego, D.R. Perrin, *Purification of Laboratory Chemicals*, Pergamon Press: Oxford, England, 1986. [↑](#endnote-ref-2)
2. A. Pelter, K. Smith, and H.C. Brown, Academic Press, 1988. [↑](#endnote-ref-3)
